# Supplementary material for: Recovery of preoperative absolute muscle strength in the quadriceps or hamstrings at time of return to sport did not affect rate of a second anterior cruciate ligament injury: a registry study
Source: Research Square preprint supplement (doi:10.21203/rs.3.rs-6971659/v1), 2025-07-15
Supplement: Supplementary file 1 [file a7df28935d67cf9790493373.docx]

**Appendix**

| Appendix table 1: Follow-up times after RTS for patients achieving PAMS or not. | | | |
| --- | --- | --- | --- |
| **Follow-up time after RTS for each variable**, [months], mean ± SD (n) | **Recovered ≥90 of PAMS** | **Did not recover ≥90% of PAMS** | **p-value** |
| Quadriceps | 52.2 ± 27.7 (139) | 50.0 ± 29.3 (51) | 0.637 |
| Hamstrings | 51.4 ± 28.4 (123) | 52.1 ± 27.6 (69) | 0.872 |
| Quadriceps + hamstrings | 51.4 ± 28.3 (99) | 51.9 ± 27.9 (91) | 0.907 |
| n = number of patients; PAMS = Preoperative absolute muscle strength; RTS = Return to sports; SD = Standard deviation. | | | |

| **Appendix table 2: Proportion of patients who recovered 90% of PAMS and hazard ratio for a second ACL injury one year after RTS** | | | | | |
| --- | --- | --- | --- | --- | --- |
|  | **Recovered 90% of PAMS (involved + uninvolved limb),** n/total patients (%) | | | **HR for a second ACL injury,**  recovering PAMS compared to not [95% CI] | |
| **Muscle group(s)** | **Second ACL injury**, n = 15 | **No second ACL injury**, n = 175 | **p-value** |  | **p-value** |
| **Quadriceps** | 11/15 (73.3%) | 128/175 (73.1%) | 1.000 | 1.01 [0.32-3.18] | 0.985 |
| **Hamstrings** | 10/15 (66.7%) | 113/175 (64.6%) | 1.000 | 1.11 [0.38-3.25] | 0.848 |
| **Quadriceps + Hamstrings** | 8/15 (53.3%) | 91/175 (52.0%) | 1.000 | 1.06 [0.38-2.92] | 0.912 |
| PAMS = Preoperative absolute muscle strength; HR = Hazard ratio; CI = Confidence interval; n = number of patients. | | | | | |

| **Appendix table 3: Proportion of patients who recovered 90% of PAMS and hazard ratio for a second ACL injury two years after RTS** | | | | | |
| --- | --- | --- | --- | --- | --- |
|  | **Recovered 90% of PAMS (involved + uninvolved limb),** n/total patients (%) | | | **HR for a second ACL injury,**  recovering PAMS compared to not [95% CI] | |
| **Muscle group(s)** | **Second ACL injury**, n = 22 | **No second ACL injury**, n = 168 | **p-value** |  | **p-value** |
| **Quadriceps** | 15/22 (68.2%) | 124/168 (73.8%) | 0.612 | 0.78 [0.32-1.31] | 0.583 |
| **Hamstrings** | 14/22 (63.6%) | 109/168 (64.9%) | 1.000 | 0.97 [0.41-2.30] | 0.938 |
| **Quadriceps + Hamstrings** | 11/22 (50.0%) | 88/168 (52.4%) | 1.000 | 0.92 [0.40-2.12] | 0.846 |
| PAMS = Preoperative absolute muscle strength; HR = Hazard ratio; CI = Confidence interval; n = number of patients. | | | | | |

| **Appendix table 4: Proportion of patients who recovered 90% of PAMS and hazard ratio for a second ACL injury after return to pre-injury Tegner level or higher** | | | | | |
| --- | --- | --- | --- | --- | --- |
|  | **Recovered 90% of PAMS (involved + uninvolved limb),** n/total patients (%) | | | **HR for a second ACL injury,**  recovering PAMS compared to not [95% CI] | |
| **Muscle group(s)** | **Second ACL injury**, n = 21 | **No second ACL injury**, n = 78 | **p-value** |  | **p-value** |
| **Quadriceps** | 14/21 (66.7%) | 55/78 (70.5%) | 0.791 | 0.87 [0.35-2.15] | 0.758 |
| **Hamstrings** | 14/21 (66.7%) | 50/78 (64.1%) | 1.000 | 1.09 [0.44-2.69] | 0.860 |
| **Quadriceps + Hamstrings** | 11/21 (52.4%) | 36/78 (46.2%) | 0.632 | 1.27 [0.54-2.99] | 0.586 |
| PAMS = Preoperative absolute muscle strength; HR = Hazard ratio; CI = Confidence interval; n = number of patients; Tegner = Tegner activity scale. | | | | | |

| **Appendix table 5: Proportion of patients who recovered 100% of PAMS and hazard ratio for a second ACL injury after RTS** | | | | | |
| --- | --- | --- | --- | --- | --- |
|  | **Recovered 100% of PAMS (involved + uninvolved limb),** n/total patients (%) | | | **HR for a second ACL injury,**  recovering PAMS compared to not [95% CI] | |
| **Muscle group(s)** | **Second ACL injury**, n = 31 | **No second ACL injury**, n = 159 | **p-value** |  | **p-value** |
| **Quadriceps** | 10/31 (32.3%) | 70/159 (40.0%) | 0.241 | 0.63 [0.30-1.34] | 0.227 |
| **Hamstrings** | 8/31 (25.8%) | 58/159 (36.5%) | 0.306 | 0.64 [0.29-1.44] | 0.284 |
| **Quadriceps + Hamstrings** | 7/31 (22.6%) | 40/159 (25.2%) | 1.000 | 0.88 [0.38-2.05] | 0.768 |
| PAMS = Preoperative absolute muscle strength; HR = Hazard ratio; CI = Confidence interval; n = number of patients; statistically significant results are marked with *. | | | | | |
